# Supplementary material
Source: publisher figshare collection journal article supplement (https://karger.figshare.com/ndownloader/files/8956561)
Supplement: Supplementary file 1 [file 8956561]

## Erratum

---

In the original article by Kim et al. entitled “TGF- $\beta$  Type I Receptor Kinase Inhibitor EW-7197 Suppresses Cholestatic Liver Fibrosis by Inhibiting HIF1 $\alpha$ -Induced Epithelial Mesenchymal Transition” [Cell Physiol Biochem 2016;38:571-588 (DOI: 10.1159/000438651)] the grant number in Acknowledgements is wrong. The correct number is given here.

### Acknowledgements

This work was supported by the National Research Foundation of Korea (NRF) grant funded by the Korea government (MSIP) (NRF-2015M2A2A7A01041499 and NRF-2014R1A1A2005644).

The authors terribly apologized for this carelessness.
